# Supplementary material
Source: publisher site journal article supplement (http://www.dovepress.com/get_supplementary_file.php?f=302167.docx)
Supplement: Supplementary file 1 [file get_supplementary_file.php]

**Supplementary Information**

- **Supplementary Table S1 Univariate regression analysis of the association between metabolic syndrome, general obesity with physical performance measures**
- **Supplementary Table S2 Multivariate linear regression analysis of the association between metabolic syndrome, general obesity with physical performance measures**
- **Supplementary Table S3 Stepwise multivariate linear regression analysis of the association between metabolic syndrome with relative grip strength**

| **Supplementary Table S1**Univariate regression analysis of the association between metabolic syndrome, general obesity with physical performance measures | | | | | | |
| --- | --- | --- | --- | --- | --- | --- |
| **Variables** | **Relative grip strength** | | **4-m walking speed** | | **TUGT** | |
| **β** | ***P*-value** | **β** | ***P*-value** | **β** | ***P*-value** |
| Metabolic syndrome | -0.263 | ＜0.001 | -0.092 | 0.001 | 0.093 | ＜0.001 |
| General obesity | -0.264 | ＜0.001 | -0.099 | ＜0.001 | 0.074 | 0.006 |
| **Notes:** β = standardized coeﬃcient; TUGT = timed up-and-go test. | | | | | | |

| **Supplementary Table S2** Multivariate linear regression analysis of the association between metabolic syndrome, general obesity with physical performance measures | | | | | | | | | |
| --- | --- | --- | --- | --- | --- | --- | --- | --- | --- |
| **Variables** | **Relative grip strength** | | | **4-m walking speed** | | | **TUGT** | | |
| **R2** | **β** | ***P*-value** | **R2** | **β** | ***P*-value** | **R2** | **β** | ***P*-value** |
| Metabolic syndrome |  |  |  |  |  |  |  |  |  |
| Model 1 | 0.300 | -0.171 | ＜0.001 | 0.162 | -0.071 | 0.005 | 0.137 | 0.093 | ＜0.001 |
| Model 2 | 0.328 | -0.153 | ＜0.001 | 0.231 | -0.017 | 0.521 | 0.186 | 0.033 | 0.224 |
| General obesity |  |  |  |  |  |  |  |  |  |
| Model 1 | 0.328 | -0.236 | ＜0.001 | 0.168 | -0.102 | ＜0.001 | 0.136 | 0.083 | 0.001 |
| Model 2 | 0.359 | -0.225 | ＜0.001 | 0.237 | -0.082 | 0.001 | 0.189 | 0.061 | 0.014 |
| **Notes:** β = standardized coeﬃcient; TUGT = timed up-and-go test.  **Abbreviations:**  Model 1: adjusted with age, sex.  Model 2: adjusted with age, sex, educational level, marital status, living situation, drinking, smoking, occupation, International Physical Activity Questionnaire (IPAQ), the number of chronic medical conditions. | | | | | | | | | |

| **Supplementary Table S3** Stepwise multivariate linear regression analysis of the association between metabolic syndrome with relative grip strength | | | | |
| --- | --- | --- | --- | --- |
| **Variables** | **β** | ***P*-value** | **Tolerance** | **VIF** |
| Age | -0.152 | ＜0.001 | 0.977 | 1.023 |
| Female | -0.410 | ＜0.001 | 0.833 | 1.200 |
| IPAQ | 0.100 | ＜0.001 | 0.981 | 1.019 |
| Education | 0.100 | ＜0.001 | 0.925 | 1.082 |
| Impaired fasting glucose | -0.065 | 0.015 | 0.986 | 1.014 |
| Abdominal obesity | -0.232 | ＜0.001 | 0.871 | 1.149 |
| **Notes:** β = standardized coeﬃcient; VIF = variance inflation factor.  **Abbreviations:** The model was fully adjusted for age, sex, educational level, marital status, living situation, drinking, smoking, occupation, International Physical Activity Questionnaire (IPAQ), the number of chronic medical conditions, with five metabolic syndrome components (abdominal obesity, impaired fasting glucose, low high-density lipoprotein cholesterol, elevated triglycerides, and high blood pressure). | | | | |
